# Supplementary material for: Mechanochemical synthesis of a high-surface-area Pd/α-Al2O3 catalyst for CO oxidative coupling to dimethyl oxalate reaction
Source: Royal Society of Chemistry journal article supplement (doi:10.1039/d2cy01895k), 2023-01-01
Supplement: d2cy01895k1.pdf [file d2cy01895k1.pdf]

## Supporting Information

# Mechanochemical Synthesis of High-surface-area Pd/ $\alpha$ -Al<sub>2</sub>O<sub>3</sub> Catalyst for CO Oxidative Coupling to Dimethyl Oxalate Reaction

*Lin Yang,<sup>a,b</sup> Zhendong Pan,<sup>a</sup> Donge Wang,<sup>a</sup> Shuaiqi Wang,<sup>a,b</sup> Xiaoping Wang,<sup>a,b</sup>*

*Huaijun Ma,<sup>a</sup> Wei Qu,<sup>a</sup> Zhijian Tian<sup>a,c\*</sup>*

<sup>a</sup> Dalian National Laboratory for Clean Energy, Dalian Institute of Chemical Physics, Chinese Academy of Sciences, Dalian, 116023, China

<sup>b</sup> University of Chinese Academy of Sciences, Beijing 100049, China

<sup>c</sup> State Key Laboratory of Catalysis, Dalian Institute of Chemical Physics, Chinese Academy of Sciences, Dalian, 116023, China

### **Corresponding Author**

Zhijian Tian

Email: tianz@dicp.ac.cn

Table S1. Band areas of bridging OH and terminal OH from FTIR spectra

| Supports                             | $A_{\text{terminal OH}}$ | $A_{\text{bridging OH}}$ |
|--------------------------------------|--------------------------|--------------------------|
| Al <sub>2</sub> O <sub>3</sub> -B    | 13.94                    | 8.33                     |
| Al <sub>2</sub> O <sub>3</sub> -B400 | 15.06                    | 5.14                     |
| Al <sub>2</sub> O <sub>3</sub> -B600 | 10.82                    | 3.95                     |
| Al <sub>2</sub> O <sub>3</sub> -B800 | 8.96                     | 1.58                     |

The peaks located at 3741 cm<sup>-1</sup> and 3719 cm<sup>-1</sup> were ascribed to terminal hydroxyls bonded to octahedral Al ions and the band centered at 3680 cm<sup>-1</sup> was assigned to a bridging OH over an octahedrally coordinated Al ion. Band areas of bridging OH and terminal OH were calculated by integrating the peaks in 3695-3660 cm<sup>-1</sup> and 3770-3695 cm<sup>-1</sup> in Figure 2 (a) respectively.

Table S2 Weight loss and OH amount of the Al<sub>2</sub>O<sub>3</sub>-Bx supports from TG results

| Supports                             | Region A <sup>a</sup> | Region B <sup>b</sup> | Region C <sup>c</sup> | OH amount <sup>d</sup> |
|--------------------------------------|-----------------------|-----------------------|-----------------------|------------------------|
|                                      | (%)                   | (%)                   | (%)                   | (mmol/g)               |
| Al <sub>2</sub> O <sub>3</sub> -B    | 2.87                  | 3.82                  | 1.04                  | 1.16                   |
| Al <sub>2</sub> O <sub>3</sub> -B400 | 0.74                  | 1.04                  | 1.01                  | 1.12                   |
| Al <sub>2</sub> O <sub>3</sub> -B600 | 0.57                  | 0.79                  | 0.45                  | 0.50                   |
| Al <sub>2</sub> O <sub>3</sub> -B800 | 0.42                  | 0.62                  | 0.40                  | 0.44                   |

<sup>a</sup> Weight loss in 40-150 °C region, <sup>b</sup> weight loss in 150-500 °C region and <sup>c</sup> weight loss in 500-1000 °C region measured by thermogravimetric analysis. <sup>d</sup> The amount of OH was calculated based on weight loss in region C (J. Mater. Chem., 1999, 9, 549-

553.) using the formulas: 
$$\text{OH amount (mmol/g)} = 2 \times \frac{m_C}{M_{H_2O}}$$
<sup>d</sup>  $m_C$  stands for weight loss in region C and  $M_{H_2O}$  is the molar mass of H<sub>2</sub>O (g/mol).

As we all know, FTIR is a technique sensitive to surface group while TG results reflect weight loss of the whole sample. The two characterizations complement each other. As suggested, we have integrated the peaks of bridging hydroxyls and terminal hydroxyls in FTIR and listed the peak area in Table S1. In TG results, the weight loss at 400 °C mainly came from interlayer water removing. In FTIR results, after

calcination at 400°C the bridging hydroxyls decreased and terminal hydroxyls increased slightly. This is probably due to a small number of terminal hydroxyls generated during dehydration. The total amount of surface hydroxyls decreased slightly. When the temperature increased to above 500 °C, the weight loss was due to hydroxyls dehydration in TG and the amount of hydroxyls decreased gradually. With calcination temperature increase, the amount of bridging hydroxyls and terminal hydroxyls both decreased gradually.

Table S3 Amount of acid sites of the Al<sub>2</sub>O<sub>3</sub>-Bx supports from NH<sub>3</sub>-TPD-MS results

| Supports                             | Amount of acid sites (μmol NH <sub>3</sub> /g) |                                |       |
|--------------------------------------|------------------------------------------------|--------------------------------|-------|
|                                      | Weak acid sites <sup>a</sup>                   | Strong acid sites <sup>b</sup> | Total |
| Al <sub>2</sub> O <sub>3</sub> -B    | 2.58                                           | 4.32                           | 6.90  |
| Al <sub>2</sub> O <sub>3</sub> -B400 | 3.22                                           | 2.96                           | 6.18  |
| Al <sub>2</sub> O <sub>3</sub> -B600 | 2.98                                           | 1.01                           | 3.99  |
| Al <sub>2</sub> O <sub>3</sub> -B800 | 0.93                                           | 0.59                           | 1.52  |

<sup>a,b</sup> Amount of weak and strong acid sites were calculated by integrating the NH<sub>3</sub> desorption peaks in 100-300 °C region and 450-700 °C region in Figure 3 and calibrated by NH<sub>3</sub>-pulse.

Table S4 Catalyst characteristics of Pd/Al<sub>2</sub>O<sub>3</sub>-Bx catalysts

| <b>Catalysts</b>                           | <b>D<sup>a</sup></b><br><b>(%)</b> | <b>d<sub>H</sub><sup>b</sup></b><br><b>(nm)</b> | <b>d<sub>T</sub><sup>c</sup></b><br><b>(nm)</b> | <b>Pd<sup>d</sup></b><br><b>(wt.%)</b> |
|--------------------------------------------|------------------------------------|-------------------------------------------------|-------------------------------------------------|----------------------------------------|
| <b>Pd/Al<sub>2</sub>O<sub>3</sub>-B</b>    | 43.2                               | 2.60                                            | 2.76                                            | 1.05                                   |
| <b>Pd/Al<sub>2</sub>O<sub>3</sub>-B400</b> | 36.3                               | 3.08                                            | 2.91                                            | 1.06                                   |
| <b>Pd/Al<sub>2</sub>O<sub>3</sub>-B600</b> | 32.7                               | 3.43                                            | 3.17                                            | 1.06                                   |
| <b>Pd/Al<sub>2</sub>O<sub>3</sub>-B800</b> | 27.3                               | 4.10                                            | 3.88                                            | 1.02                                   |

<sup>a</sup> Pd dispersion (D) was calculated as:  $D (\%) = S_f \times \frac{V_{ads}}{V_g} \times \frac{M_{Pd}}{w} \times 100\%$ , where S<sub>f</sub> stands for stoichiometry factor (assume H/Pd=1), V<sub>ads</sub> represents volume of adsorbed H<sub>2</sub> (cm<sup>3</sup>/g), V<sub>g</sub> stands for molar volume of gas at standard temperature and pressure (22414 cm<sup>3</sup>/mol), M<sub>Pd</sub> represents molecular weight of Pd (g/mol) and w stands for Pd loading in samples (%). <sup>b</sup> The Pd particle size (d<sub>H</sub>) determined by H<sub>2</sub> chemisorption was calculated as: d<sub>H</sub>=1.12/D.; <sup>c</sup> Pd NPs size (d<sub>T</sub>) was measured by TEM by counting more than 100 particles in the images and calculated by the

formulas:  $d_T = \frac{\sum n_i \times d_i}{\sum n_i}$ ; <sup>d</sup> Pd loading determined by ICP.

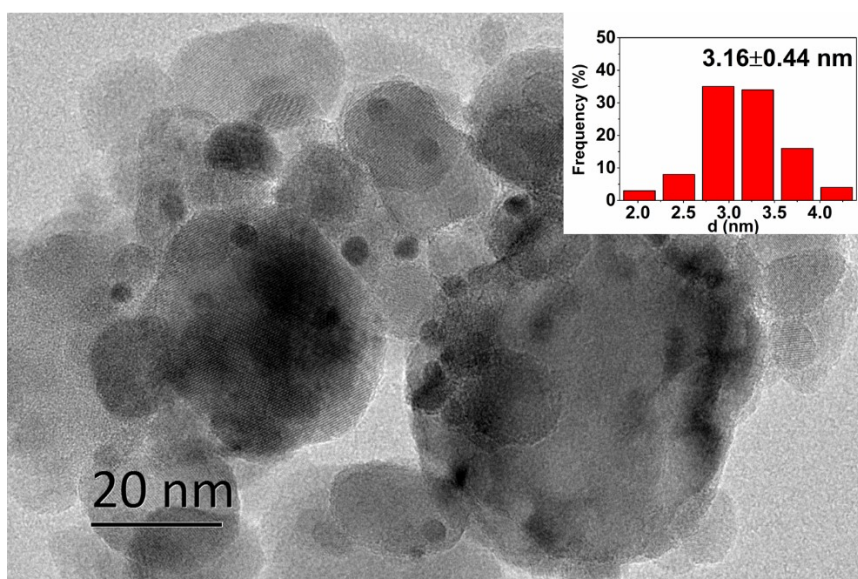

Figure S1 Pd/Al<sub>2</sub>O<sub>3</sub>-B catalyst after 100 h test

Table S5. Textural properties of Pd/Al<sub>2</sub>O<sub>3</sub>-B and Pd/Al<sub>2</sub>O<sub>3</sub>-B after 100 h test

| Catalysts                                                | S <sub>BET</sub><br>(m <sup>2</sup> /g) <sup>a</sup> | V <sub>Pore</sub><br>(cm <sup>3</sup> /g) <sup>b</sup> | D <sub>Pore</sub><br>(nm) <sup>c</sup> |
|----------------------------------------------------------|------------------------------------------------------|--------------------------------------------------------|----------------------------------------|
| Pd/Al <sub>2</sub> O <sub>3</sub> -B                     | 65.7                                                 | 0.16                                                   | 8.0                                    |
| Pd/Al <sub>2</sub> O <sub>3</sub> -B<br>after 100 h test | 62.9                                                 | 0.16                                                   | 8.0                                    |

<sup>a</sup> S<sub>BET</sub> represents BET surface area; <sup>b</sup> V<sub>Pore</sub> represents volume of pores; <sup>c</sup> D<sub>Pore</sub> represents average pore diameter

Table S6. Product distribution in CO oxidative coupling to DMO reaction on Pd/Al<sub>2</sub>O<sub>3</sub>-Bx catalysts

| Catalysts                               | S <sub>DMO</sub> (%) | S <sub>DMC</sub> (%) |
|-----------------------------------------|----------------------|----------------------|
| Pd/Al <sub>2</sub> O <sub>3</sub> -B    | 85.3                 | 14.7                 |
| Pd/Al <sub>2</sub> O <sub>3</sub> -B400 | 80.2                 | 19.8                 |
| Pd/Al <sub>2</sub> O <sub>3</sub> -B600 | 94.3                 | 5.7                  |
| Pd/Al <sub>2</sub> O <sub>3</sub> -B800 | 99.8                 | 0.2                  |

DMO and DMC were products of CO oxidative coupling with MN and methanol and MF were products of MN decomposition. Thus only DMO and DMC were considered in the calculation of CO selectivity.
